## 22 **Abstract**

23 In the absence of national control programmes against Rhodesian human African  
24 trypanosomiasis, farmer-led treatment of cattle with pyrethroid-based insecticides may be an  
25 effective strategy for foci at the edges of wildlife areas, but there is limited evidence to  
26 support this.

27 We combined data on insecticide use by farmers, tsetse abundance and trypanosome  
28 prevalence with mathematical models to quantify the likely impact of insecticide-treated  
29 cattle.

30 Sixteen percent of farmers reported treating cattle with a pyrethroid, and chemical analysis  
31 indicated 18% of individual cattle had been treated, in the previous week. Treatment of cattle  
32 was estimated to increase daily mortality of tsetse by 5 – 14%. Trypanosome prevalence in  
33 tsetse, predominantly from wildlife areas, was 1.25% for *T. brucei s.l.* and 0.03% for *T. b.*  
34 *rhodesiense*. For 750 cattle sampled from 48 herds, 2.3% were PCR positive for *T. brucei s.l.*  
35 and none for *T. b. rhodesiense*. Using mathematical models, we estimated there was 8 – 29%  
36 increase in mortality of tsetse in farming areas and this increase can explain the relatively low  
37 prevalence of *T. brucei s.l.* in cattle.

38 Farmer-led treatment of cattle with pyrethroids is likely, in part, to be limiting the spill-over  
39 of human-infective trypanosomes from wildlife areas.

40

## 41 **Author summary**

42 The acute form of sleeping sickness in Africa is caused by the parasite *Trypanosoma brucei*  
43 *rhodesiense*. It is transmitted by tsetse flies and can be maintained in cycles involving both  
44 livestock and wildlife as hosts. Humans are incidentally infected and are particularly at risk

45 of infection near protected areas where there are both wildlife and suitable habitat for tsetse.  
46 In these regions, the tsetse vector cannot be eradicated, nor can infection be prevented in  
47 wildlife. Here we use field studies of tsetse and livestock in combination with mathematical  
48 models of tsetse population change and trypanosome transmission to show that use of  
49 pyrethroid-based insecticides on cattle by farmers at the edge of protected areas could be  
50 contributing to lowering the risk of sleeping sickness in Serengeti District, Tanzania. To our  
51 knowledge, our study is the first to report farmer-led tsetse control, co-incident with tsetse  
52 decline and relatively low prevalence of *T. brucei s.l.* in cattle.

53

## 54 **Introduction**

55 In East and Southern Africa, tsetse flies (*Glossina* spp) transmit *Trypanosoma brucei*  
56 *rhodesiense*, which causes Rhodesian human African trypanosomiasis (r-HAT). Tsetse also  
57 transmit *T. congolense*, *T. vivax* and *T. brucei*, the causative agents of animal African  
58 trypanosomiasis (AAT) in livestock.

59 *Trypanosoma brucei s.l.*, *T. congolense* and *T. vivax* can circulate in transmission cycles  
60 involving livestock or wild mammals [1]. The extensive conservation areas of East and  
61 Southern Africa that support tsetse, as well as wildlife, can therefore be foci for r-HAT and  
62 AAT. At the interface of wildlife- and livestock areas, there is potential for trypanosomes to  
63 shift from a wildlife- to a livestock-dominated cycle of transmission [1]. Although existing r-  
64 HAT foci are often associated with wildlife areas, the importance of cattle as reservoirs at the  
65 wildlife-livestock interface is unclear [1].

66 There are few studies that address the role of cattle in r-HAT transmission in wildlife-  
67 livestock interface areas. Kaare et. al. [2] suggested that r-HAT could be re-emerging in  
68 Serengeti District, Tanzania, based on surveys of cattle adjacent to the Serengeti National

69 Park in 2001, where they found 5.6% of cattle positive for *T. brucei s.l.* DNA and ~1% of  
70 518 cattle sampled as positive for *T. b. rhodesiense* DNA.

71 With c. 1.4 million people living at moderate to high risk of *T. b. rhodesiense* in East and  
72 Southern Africa [3], there is a need to identify appropriate control measures that can reduce  
73 the risk of trypanosomiasis for both people and cattle living near wildlife areas. Previous  
74 modelling has indicated that insecticide-treated cattle could offer an effective method of  
75 control, particularly for r-HAT [4], but modelling has not been extended to consider wildlife-  
76 livestock interface areas.

77 We previously found that numbers of tsetse caught in traps declined by >90% across a  
78 wildlife-livestock interface in Serengeti District, Tanzania, with no tsetse being caught >5 km  
79 into farming areas [5]. Our previous work showed that this was due, in part, to reduced  
80 availability of habitat suitable for tsetse. This is likely to be typical for other r-HAT foci in  
81 and near wildlife areas, where increasing human and livestock densities lead to a reduction in  
82 tsetse habitat. However, the effect of habitat did not fully explain the change in tsetse  
83 abundance [5]. At the same time, we obtained preliminary evidence that livestock farmers  
84 were frequently treating their cattle with pyrethroids, insecticides effective against tsetse [6].  
85 It seems likely that mass treatment of cattle with insecticide is reducing the density of tsetse  
86 populations and hence trypanosomes.

87 We aimed to assess whether the presence of insecticide-treated cattle is contributing to the  
88 decline in tsetse and quantify the impact of such a decline in tsetse on the transmission of  
89 trypanosomes in cattle at the interface between wildlife and livestock populations.

90

91

## 92 **Methods**

### 93 **Study site**

94 Our study site comprised the Serengeti National Park, adjacent game reserves and farming  
95 areas (S1 Fig). Farming areas are used predominately for livestock grazing and crop  
96 production, with c. 30 cattle/km<sup>2</sup> [7].

97 The study site supports three species of tsetse – *G. swynnertoni*, *G. pallidipes* and *G.*  
98 *brevipalpis* [5]. The Serengeti area is an historic r-HAT focus [8]. Since the last outbreak in  
99 2000/2001, during which at least 20 cases were reported in local populations and tourists  
100 [9,10], sporadic cases continue to occur [3].

101

### 102 **Tsetse surveys**

103 We carried out surveys during February, June-July and October 2015 along four transects  
104 from 5 km inside wildlife areas, to 10 km into farming areas (S1 Fig). We set a total of 72  
105 odour-baited Nzi traps, 38 inside wildlife areas and 34 outside, during each survey and  
106 emptied traps each day for three consecutive days, recording the sex and species of tsetse.  
107 Full details of the survey method are provided in Lord et al. (2018) [5].

108 We caught fewer than 100 *G. brevipalpis* during the study, so our analyses focussed only on  
109 *G. pallidipes* and *G. swynnertoni*. Since daily numbers ( $y$ ) of tsetse caught per day in traps  
110 were overdispersed, we transformed the data to  $\log_{10}(y + 1)$  before calculation of average  
111 counts per trap.

112 During 2016 we carried out additional trapping inside wildlife areas, up to 10 km from the  
113 boundary, to catch sufficient numbers of tsetse to quantify the prevalence of *T. congolense*

114 savanna and *T. brucei s. l.* in tsetse. *T. congolense* presence was used as a proxy for AAT,  
115 being more prevalent than *T. vivax* in the study area [2].

116 During each survey in 2015 and 2016, we transported tsetse flies, preserved in ethanol in  
117 individual tubes, to the Liverpool School of Tropical Medicine and then processed them for  
118 the detection of trypanosome DNA (S1 Text).

### 119 **Livestock surveys**

120 We carried out a cross-sectional livestock survey, in villages <5 km from the wildlife  
121 boundary, during July-August 2016. A total of 48 herds and 750 cattle were selected using a  
122 stratified selection method (S1 text). For each sampled animal, we collected blood from the  
123 jugular vein into PAXGENE tubes, and recorded details of age, sex and any treatments given  
124 in the last six months. We administered a questionnaire to each livestock keeper to collect  
125 information on current vector control practices. Questions included the date the animals were  
126 last treated with insecticide and the method of application. Blood samples were tested by  
127 PCR for the presence of *T. brucei* and *T. congolense* DNA (S1 Text).

128 In addition to asking farmers about use of insecticides, we also analysed hair for the presence  
129 of pyrethroids. Using disposable razors, we collected hair samples (0.04 g/animal) from the  
130 flank of four randomly-selected cattle within each herd, giving a total of 176 samples, which  
131 were sealed individually in foil bags. Cypermethrin and alpha-cypermethrin was extracted  
132 from each sample in acetone and assayed by gas chromatography-mass spectrometry (GC-  
133 MS) (S1 Text). This method can detect the presence of insecticide at 7 days post application,  
134 but not at 14 days [11].

### 135 **Ethics statement**

136 Cattle sampling involved venous blood sampling and collection of hair samples (procedures  
137 classified as 'mild' under UK Home Office regulations). Discussions regarding the veterinary

138 sampling were undertaken with key administrative and community leaders to inform  
139 communities of the overall study and mobilise households to participate. Animals were  
140 sampled by veterinarians or trained paraveterinary workers. Jugular blood samples (10ml)  
141 were taken into sterile vacutainers and hair samples collected using a safety razor. The  
142 animals were restrained appropriately to minimise the time and distress involved in the  
143 process of sample collection. All sampling was undertaken under the supervision of a  
144 veterinarian. Ethical approval for this work was obtained from the SRUC Animal  
145 Experiments Committee and the Commission for Science and Technology (Costech) in  
146 Tanzania (permit number 2016-33-NA-2014-233).

#### 147 **Data summary**

148 We calculated the prevalence, and exact binomial 95% confidence intervals, for *T. brucei s.*  
149 *l.*, *T. brucei rhodesiense* and *T. congolense* in cattle and tsetse as the percentage of  
150 individuals testing PCR positive for each trypanosome species and subspecies. For tsetse, this  
151 prevalence includes infected flies that might not be infectious.

152 To estimate the possible range of tsetse daily mortality attributable to insecticide-treated  
153 cattle, we assumed that any given tsetse fly contacts a vertebrate host either every two or  
154 every three days [12]. We then estimated the proportion of cattle treated, using information  
155 from hair sample analysis and questionnaire responses. We divided this proportion by the  
156 duration of the feeding cycle, assuming that a fly would die from contacting any host testing  
157 positive for insecticide [6]. Under the hypothesis that cattle were treated with insecticide, we  
158 could not estimate the proportion of bloodmeals from cattle – because, by assumption, those  
159 that had fed on treated cattle would not be caught for analysis. We therefore made the  
160 assumption that cattle were the only source of bloodmeals in farming areas [13].

161

## 162 Modelling tsetse population dynamics across the wildlife-livestock interface

163 To estimate the additional tsetse mortality in farming areas, we developed a spatially-explicit  
164 model of tsetse population dynamics and fitted the model to the tsetse catch data.

165 We describe changes in numbers of pupae ( $P$ ) and adult tsetse ( $A$ ) in space and time using  
166 two recursion equations on a lattice (S2 Text). Parameters used are described in Table 1.

167

168 **Table 1. Parameters and values used in the model of tsetse population dynamics.** Values

169 are per 0.25 days. Each cell in the area modelled is a square of side 500 m.

| Notation | Description                                                | Value  | Range                     | Reference |
|----------|------------------------------------------------------------|--------|---------------------------|-----------|
| $l$      | Probability female tsetse larviposits                      | 0.025  | 0.02 – 0.031              | [14,15]   |
| $\beta$  | Probability pupa emerges as an adult                       | 0.008  | 0.005 – 0.0075            | [15,16]   |
| $\delta$ | Pupal density-dependent mortality coefficient              | Fitted | $10^{-5.60} - 10^{-4.65}$ | NA        |
| $\mu_P$  | Pupal probability of mortality                             | 0.0015 | 0.000625 – 0.0025         | [15,17]   |
| $\mu_B$  | Adult baseline probability of mortality                    | 0.0075 | 0.0025 – 0.0075           | [18]      |
| $a$      | Adult diffusion coefficient                                | 0.25   | 0.1 – 0.5                 | [19]      |
| $\mu_F$  | Adult additional probability of mortality in farming areas | Fitted | 0.0075 – 0.125            | NA        |

170

171 Reflecting boundaries were used in the lattice so that for cells at the edge of the lattice,  
172 numbers of tsetse moving in were equivalent to those leaving. Each day, in each cell  $i,j$  a  
173 proportion  $a$  of adult tsetse diffuse into adjacent cells. Adult females, assumed to be half the  
174 population, produce pupae with probability  $l$ . Adults die with probability  $\mu_B$ . Pupae emerge as  
175 adults with probability  $\beta$  and are subject to density-independent ( $\mu_P$ ) and density-dependent  
176 ( $P\delta$ ) deaths. In addition to the baseline mortality, adults present in cells designated as



177 ‘farming’ areas are subject to an additional mortality ( $\mu_F$ ) to represent insecticide use and  
178 habitat degradation.

179 We carried out a sensitivity analysis (S3 Text), to quantify how the modelled decline in tsetse  
180 density across the wildlife-livestock interface was influenced by model parameter values. We  
181 then fitted the model to observed tsetse abundance data using nonlinear least squares  
182 regression implemented with the Levenberg-Marquardt Algorithm, accounting for  
183 uncertainty in parameter values (S3 Text).

184

### 185 **Modelling trypanosome transmission dynamics across the wildlife-livestock interface**

186 To quantify the effect of tsetse population decline on trypanosome prevalence in cattle in the  
187 interface area, we extended the tsetse model to include trypanosome transmission (S2 Text).

188 In addition to tsetse population dynamics described above, adult tsetse in each cell progress  
189 through susceptible teneral (juvenile unfed) ( $S_V$ ) to either susceptible non-teneral ( $G_V$ ), or  
190 exposed ( $E_{IV} - E_{3V}$ ) and then infectious ( $I_V$ ) classes. Instead of having a fixed-time for the  
191 tsetse incubation period, or assuming that the incubation period is exponentially distributed,  
192 we model three exposed classes as per [14], assuming an Erlang distributed waiting time for  
193 the extrinsic incubation period [15]. Hosts in each cell progress through susceptible ( $S_H$ ),  
194 exposed ( $E_H$ ), infected/ infectious ( $I_H$ ) and recovered ( $R_H$ ) classes. We assumed that host  
195 populations do not move, and host birth and death rates are equal.

196 Due to uncertainty in parameter values (Table 2) for trypanosome transmission, to quantify  
197 the potential effect of the tsetse population decline on transmission across the interface, we  
198 first ran a sensitivity analysis without increased tsetse mortality (S3 Text). To determine the  
199 potential effect of increased tsetse mortality in farming areas on cattle trypanosome  
200 prevalence we selected from the sensitivity analysis combinations of parameter values that

201 produced tsetse prevalence at equilibrium within the range observed in our study site for *T.*  
 202 *brucei* and *T. congolense*. We then ran the model using the selected parameter combinations  
 203 and including an additional tsetse mortality, the value of which we obtained from fitting the  
 204 model of tsetse population dynamics to observed tsetse abundance.

205

206 **Table 2. Parameters and values used in the trypanosome transmission model.** See Table  
 207 1 for tsetse population dynamics parameters.

| Notation   | Description                                                                           | Value  | Range*       | Reference  |
|------------|---------------------------------------------------------------------------------------|--------|--------------|------------|
| $\beta_H$  | Host daily probability of birth                                                       | 0.0003 | NA           | NA         |
| $\mu_H$    | Host daily probability of mortality                                                   | 0.0003 | NA           | NA         |
| $\alpha$   | Daily probability of tsetse feeding                                                   |        | 1/3 - 1/2    | [22]       |
|            | Probability of teneral tsetse acquiring                                               |        |              | [23–26]    |
| $p_S$      | trypanosome infection given bite on an infected host                                  |        | 0 - 0.5      |            |
|            | Probability of non-teneral tsetse acquiring                                           |        |              | [23,25,26] |
| $p_G$      | trypanosome infection given bite on an infected host                                  |        | 0 - 0.1      |            |
| $\sigma_V$ | Proportion of infected tsetse that become infectious per day                          |        | 1/30 - 1/15  | [21]       |
| $p_H$      | Probability of host acquiring trypanosome infection given bite from infectious tsetse |        | 0.2 – 0.8    | NA         |
| $\gamma$   | Probability of recovered host becoming susceptible per day                            |        | 1/100 - 1    | NA         |
| $\sigma_H$ | Proportion of exposed/ infected hosts that become infectious per day                  |        | 1/15 - 1/5   | [27,28]    |
| $\varphi$  | Proportion of infected hosts that recover per day                                     |        | 1/100 - 1/25 | [27,28]    |

208 \*Values used for both *T. brucei* and *T. congolense*

209 Both the tsetse population dynamics and trypanosome transmission models, plus code to  
210 produce the figures in this manuscript can be accessed at  
211 [https://github.com/jenniesuz/tsetse\\_wli.git](https://github.com/jenniesuz/tsetse_wli.git).

## 212 **Results**

### 213 **Observed tsetse decline across the wildlife-livestock interface**

214 Mean daily numbers of both *G. pallidipes* and *G. swynnertoni* caught per trap declined to  
215 zero by 5 km outside wildlife areas in the second and third quarterly surveys of 2015, similar  
216 to that observed during the first survey in February 2015 (Fig 1, [5]). Across all three surveys  
217 in wildlife areas, >99% of traps caught at least one tsetse, whereas in farming areas 58% of  
218 traps did not catch any flies.

219

220 **Fig 1. Mean numbers of tsetse caught across the wildlife-livestock interface by season**  
221 **and species during 2015.**

222

### 223 **Observed trypanosome prevalence in tsetse and cattle**

224 During 2015 and 2016 we caught 5986 tsetse, which were tested for the presence of  
225 trypanosome DNA. Only 4% flies sampled during 2015 were from farming areas. Both *T.*  
226 *congolense* and *T. brucei s.l.* were detected and two flies from wildlife areas tested positive  
227 for *T. b. rhodesiense* (Table 3). Of the 750 cattle sampled in 2016, none was positive for *T. b.*  
228 *rhodesiense* DNA and *T. brucei s.l.* prevalence was one seventh of that for *T. congolense*  
229 (Table 3).

230

231 **Table 3. Prevalence of trypanosome species in tsetse and cattle.** Prevalence defined as the  
232 percentage of hosts or vectors testing positive for the presence of DNA for the respective  
233 species: 95% confidence intervals in parentheses.

|               |                    | <b>Prevalence (%)</b>               |                              |                             |
|---------------|--------------------|-------------------------------------|------------------------------|-----------------------------|
|               | <b>No. sampled</b> | <b><i>T. brucei rhodesiense</i></b> | <b><i>T. brucei s.l.</i></b> | <b><i>T. congolense</i></b> |
| <b>Tsetse</b> | 5986               | 0.03 (0.004 - 0.121)                | 1.25 (0.09 - 1.57)           | 5.34 (4.79 - 5.94)          |
| <b>Cattle</b> | 750                | 0 (0 - 0.005)                       | 2.3 (1.3 - 3.6)              | 16.7 (14.1 - 19.5)          |

234

### 235 **Insecticide use**

236 Of the 44 livestock owners questioned about insecticide use, 67% reported treating at least  
237 some of their cattle with a pyrethroid within the previous month and 16% reported treating  
238 within the previous week. Chemical analyses of hair samples collected at the time of the  
239 questionnaire showed that 18% of 176 individual cattle and 27% of 44 herds had detectable  
240 levels of alphacypermethrin or cypermethrin, indicating treatment within c. 7 days.

241 If we assume a three-day feeding cycle, and that 16% of cattle are treated weekly, tsetse  
242 mortality from insecticide-treated cattle would be c. 0.05 per day. If we assume a two-day  
243 feeding cycle and that 27% cattle are treated, mortality from insecticide would be c. 0.14 per  
244 day.

245

### 246 **Simulating tsetse population dynamics across the wildlife-livestock interface**

247 We fitted the tsetse population dynamics model to mean tsetse catches per trap per day across  
248 all seasons, given that catches of both *G. pallidipes* and *G. swynnertoni*, across all seasons,  
249 declined to zero by 5 km outside wildlife areas (Fig 1).

250 Using the parameter values in Table 1, the best fit additional daily probability of adult  
251 mortality ( $\mu_F$ ) was 0.15 per day (S1 Table, Fig 2). Of the fixed parameters, daily dispersal  
252 distance ( $a$ ) and daily probability of larviposition ( $l$ ) had the biggest influence on the relative  
253 density of tsetse 1 km inside farming areas, compared to density 5 km inside wildlife areas,  
254 with PRCC  $> 0.5$  and  $< -0.5$ , respectively (S2 Fig, S3 Fig). Depending on values for the daily  
255 probability of larviposition and dispersal, fitted values for additional daily probability of  
256 mortality varied between 0.08 and 0.29 (S1 Table).

257

258 **Fig 2. Modelled decline in tsetse abundance across the wildlife-livestock interface.** Model  
259 fitted by nonlinear least squares regression to mean daily tsetse caught per trap across three  
260 surveys in 2015. Negative distances on  $x$  axis indicate inside wildlife areas where no  
261 additional mortality was modelled. The  $y$  axis is on log scale. Darker points indicate samples  
262 from multiple traps at the same distance.

263

#### 264 **Simulating trypanosome transmission across the wildlife-livestock interface**

265 Of the parameters detailed in Table 2, host incubation, host probability of infection and  
266 probability of recovery had the biggest effect on prevalence of trypanosomes in hosts, while  
267 the proportion of infected hosts that recover per day, and host-to-vector transmission  
268 probabilities had the biggest effect on prevalence of trypanosomes in vectors (S4 Fig, S5  
269 Fig). From sensitivity analysis, of 1000 simulations with different parameter values, 138 had  
270 tsetse prevalence within the confidence intervals of that observed for *T. brucei s.l.* and 150  
271 for *T. congolense*. Using these remaining parameter combinations, with the estimated  
272 additional mortality, *T. brucei* prevalence in hosts was on average 9.8% at 1 km from wildlife  
273 areas across simulations, declining to an average 4.0% by 2 km outside of wildlife areas

274 across simulations, but *T. congolense* prevalence was on average 45.1% at 1 km outside of  
275 wildlife areas and 27.7% by 2 km across simulations (Fig 3).

276

277 **Fig 3. Modelled decline in trypanosome prevalence across the wildlife-livestock**  
278 **interface.** Assuming additional probability of tsetse mortality/day in farming areas to be  
279 0.152 as per model fits to the observed tsetse data, assuming tsetse disperse on average 500  
280 m/day. The solid horizontal line in each boxplot shows the mean output from model runs  
281 using combinations of parameter values from sensitivity analysis that could explain the  
282 observed tsetse prevalence and hinges represent 25<sup>th</sup> and 75<sup>th</sup> percentiles.

283

## 284 **Discussion**

285 We report the use of pyrethroid-based insecticides by farmers in Serengeti District at a  
286 frequency sufficient to impact tsetse populations. Our results support the findings of Ngumbi  
287 et al. [16] who reported the use of pyrethroids by farmers in Pangani, Myomero and Korogwe  
288 districts of Tanzania. To our knowledge, however, our study is the first to report farmer-led  
289 tsetse control, co-incident with tsetse decline and relatively low prevalence of *T. brucei s.l.* in  
290 cattle. There are other examples of insecticide-treated cattle being used to control tsetse and  
291 trypanosomiasis, but these were implemented by commercial ranches or with strong support  
292 from government institutions or donors [17–20]. Further detail on the scale of use across  
293 Tanzania, and why individual farmers are choosing to treat their cattle warrant further  
294 investigation.

295 Coupling questionnaires with hair sample analysis as we did in this study would be beneficial  
296 in further investigations. Questionnaires may be useful for gathering information on use, but  
297 issues with product labelling, including language translation, could result in inadequate

298 application [21]. This may explain differences between reported insecticide use and  
299 quantified amounts on hair. The use of gas chromatography-mass spectrometry for analysis  
300 of livestock hair samples is expensive and a more cost-effective method for quantifying  
301 insecticide concentrations would be beneficial for future studies to aid larger-scale  
302 assessments of actual use.

303 With respect to the increased tsetse mortality in farming areas, due to uncertainty in both the  
304 data and model estimates, it was not possible to separate out mortality due to either  
305 insecticide-treated cattle or habitat degradation. A better understanding of the relative  
306 contribution of habitat degradation to tsetse decline at wildlife-livestock interface areas  
307 would help to identify where and when insecticide-treated cattle would be most effective.

308 *T. brucei s.l.* and *T. b. rhodesiense* prevalence, observed in cattle in Serengeti District during  
309 2001, suggested to Kaare et al. [2] that r-HAT was re-emerging in this area. The *T. brucei s.l.*  
310 prevalence in our study was 1.25% (0.09 - 1.57) compared with 5.6% (3.78 – 7.94) estimated  
311 by Kaare et al. [2] and therefore there does not appear to have been an increase in risk in this  
312 area over time. Our modelling suggests that in areas of relatively high cattle density, such as  
313 our study site, where the majority of tsetse blood meals are from cattle, modest use of  
314 insecticide-treated cattle by livestock farmers can reduce the role of cattle in *T. b. rhodesiense*  
315 transmission despite the presence of high tsetse densities in adjacent wildlife areas. Treating  
316 cattle with pyrethroids may however be less effective against AAT [4]. Farmers at the  
317 boundary of wildlife areas are still therefore likely to treat their animals with trypanocides.

318 Our modelling involved several assumptions. We assumed that there was no overall change  
319 in tsetse population and trypanosome prevalence in wildlife areas over time. We did not  
320 account for seasonal changes in wild host movement which may influence prevalence in  
321 adjacent wildlife areas and therefore risk of infection in cattle. Nor did we account for

322 trypanocide use, heterogeneity in insecticide-treated cattle use, or habitat quality in farming  
323 areas. These are likely important factors driving trypanosome prevalence. Our study does,  
324 however, extend the modelling carried out by Hargrove et al. [4] in being spatially-explicit  
325 and considering an interface context.

326 Treatment of cattle with insecticide offers the most cost-effective method of tsetse control  
327 [22] and in East Africa the risk of both tick- and tsetse-borne diseases of livestock provides a  
328 strong incentive for livestock keepers to treat their cattle regularly [23]. Effective control of  
329 savanna tsetse requires interventions conducted over large (>100 km<sup>2</sup>) areas [24]. This is  
330 possible for large commercial ranches [17,18] but much more difficult to implement and  
331 sustain with small-scale livestock farmers without co-ordination and financial support from  
332 donor or government agencies. Our findings, however, provide evidence that small-scale  
333 farmers can be enabled to control r-HAT. It is important to understand why farmers in  
334 Serengeti have adopted this strategy. For example, if ticks and tick-borne diseases are a major  
335 driver, then sustainable options that mitigate against resistance in the tick vector would be a  
336 priority. Understanding the underlying social, economic and political drivers of this  
337 phenomenon may lead us to the elusive goal of sustainable and cost-effective control of  
338 trypanosomiasis in east and southern Africa.

339

#### 340 **Acknowledgements**

341 The authors thank the field staff at Vector and Vector- Borne Diseases Research Institute,  
342 Tanzania. Permits were acquired from COSTECH and TAWIRI, Tanzania. The authors  
343 would also like to thank Louise Matthews and Shaun Keegan for providing review of the  
344 manuscript.

345



346

347 **References**

- 348 1. Auty H, Morrison LJ, Torr SJ, Lord J. Transmission dynamics of Rhodesian sleeping  
349 sickness at the interface of wildlife and livestock areas. *Trends Parasitol.* 2016;32:  
350 608–621. doi:10.1016/j.pt.2016.05.003
- 351 2. Kaare MT, Picozzi K, Mlengeya T, Fèvre EM, Mellau LS, Mtambo MM, et al.  
352 Sleeping sickness - a re-emerging disease in the Serengeti? *Travel Med Infect Dis.*  
353 2007;5: 117–24. doi:10.1016/j.tmaid.2006.01.014
- 354 3. Simarro PP, Cecchi G, Franco JR, Paone M, Diarra A, Ruiz-Postigo JA, et al.  
355 Estimating and mapping the population at risk of sleeping sickness. *PLoS Negl Trop*  
356 *Dis.* 2012;6: e1859. doi:10.1371/journal.pntd.0001859
- 357 4. Hargrove JW, Ouifki R, Kajunguri D, Vale G a, Torr SJ. Modeling the control of  
358 trypanosomiasis using trypanocides or insecticide-treated livestock. *PLoS Negl Trop*  
359 *Dis.* 2012;6: e1615. doi:10.1371/journal.pntd.0001615
- 360 5. Lord JS, Torr SJ, Auty HK, Brock PM, Byamungu M, Hargrove JW, et al.  
361 Geostatistical models using remotely-sensed data predict savanna tsetse decline across  
362 the interface between protected and unprotected areas in Serengeti, Tanzania. *J Appl*  
363 *Ecol.* 2018;55: 1997–2007. doi:10.1111/1365-2664.13091
- 364 6. Torr SJ, Maudlin I, Vale GA. Less is more: Restricted application of insecticide to  
365 cattle to improve the cost and efficacy of tsetse control. *Med Vet Entomol.* 2007;21:  
366 53–64. doi:10.1111/j.1365-2915.2006.00657.x
- 367 7. Robinson TP, William Wint GR, Conchedda G, Van Boeckel TP, Ercoli V, Palamara  
368 E, et al. Mapping the global distribution of livestock. *PLoS One.* 2014;9.

- 369           doi:10.1371/journal.pone.0096084
- 370    8.    Davey BYJB. The outbreak of human trypanosomiasis (*Trypanosoma rhodesiense*  
371           infection) in Mwanza district, Tanganyika territory. *Trans R Soc Trop Med Hyg.*  
372           1924;17: 474–481.
- 373    9.    Jelinek T, Bisoffi Z, Bonazzi L, van Thiel P, Bronner U, de Frey A, et al. Cluster of  
374           African trypanosomiasis in travelers to Tanzanian national parks. *Emerg Infect Dis.*  
375           2002;8: 634–5. doi:10.3201/eid0806.010432
- 376    10.   Ripamonti D, Massari M, Arici C, Gabbi E, Farina C, Brini M, et al. African sleeping  
377           sickness in tourists returning from Tanzania: the first 2 Italian cases from a small  
378           outbreak among European travelers. *CID.* 2002;34: e19-22.
- 379    11.   Lea R. Ecology and control of tsetse at the interface of conservation and farming areas  
380           in northern Tanzania. University of Liverpool. 2019.
- 381    12.   Hargrove J, Williams B. A cost-benefit analysis of feeding in female tsetse. *Med Vet*  
382           *Entomol.* 1995;9: 109–119.
- 383    13.   Muturi CN, Ouma JO, Malele II, Ngure RM, Rutto JJ, Mithöfer KM, et al. Tracking  
384           the feeding patterns of tsetse flies (*Glossina* genus) by analysis of bloodmeals using  
385           mitochondrial cytochromes genes. *PLoS One.* 2011;6: e17284.  
386           doi:10.1371/journal.pone.0017284
- 387    14.   Rock KS, Torr SJ, Lumbala C, Keeling MJ. Quantitative evaluation of the strategy to  
388           eliminate human African trypanosomiasis in the Democratic Republic of Congo.  
389           *Parasit Vectors.* 2015; 1–13. doi:10.1186/s13071-015-1131-8
- 390    15.   Dale C, Welburn SC, Maudlin I, Milligan PJM. The kinetics of maturation of  
391           trypanosome infections in tsetse. *Parasitology.* 1995;111: 187.

392 doi:10.1017/S0031182000064933

393 16. Ngumbi AF, Silayo RS. A cross-sectional study on the use and misuse of trypanocides  
394 in selected pastoral and agropastoral areas of eastern and northeastern Tanzania.

395 Parasites and Vectors. *Parasites & Vectors*; 2017;10: 1–9. doi:10.1186/s13071-017-  
396 2544-3

397 17. Fox RGR, Mmbando SO, Fox MS, Wilson A. Effect on herd health and productivity of  
398 controlling tsetse and trypanosomosis by applying deltamethrin to cattle. *Trop Anim*  
399 *Health Prod.* 1993;25: 203–214. doi:10.1007/BF02250869

400 18. Baylis M, Stevenson P. Trypanosomiasis and tsetse control with insecticidal pour-ons -  
401 Fact and fiction? *Parasitol Today.* 1998;14: 77–82. doi:10.1016/S0169-  
402 4758(97)01170-8

403 19. Warnes ML, Van Den Bossche P, Chihya J, Mudenge D, Robinson TP, Shereni W, et  
404 al. Evaluation of insecticide-treated cattle as a barrier to re-invasion of tsetse to cleared  
405 areas in northeastern Zimbabwe. *Med Vet Entomol.* 1999;13: 177–184.

406 doi:10.1046/j.1365-2915.1999.00148.x

407 20. Hargrove J, Omolo S, Msalilwa J, Fox B. Insecticide-treated cattle for tsetse control:  
408 The power and the problems. *Med Vet Entomol.* 2000;14: 123–130.

409 doi:10.1046/j.1365-2915.2000.00226.x

410 21. Allan F. East Coast fever and vaccination at the livestock/wildlife interface. University  
411 of Edinburgh. 2018.

412 22. Shaw APM, Torr SJ, Waiswa C, Cecchi G, Wint GRW, Mattioli RC, et al. Estimating  
413 the costs of tsetse control options: An example for Uganda. *Prev Vet Med. Elsevier*

414 *B.V.*; 2013;110: 290–303. doi:10.1016/j.prevetmed.2012.12.014

- 415 23. Muhanguzi D, Picozzi K, Hatendorf J, Thrusfield M, Welburn SC, Kabasa JD, et al.  
416 Collateral benefits of restricted insecticide application for control of African  
417 trypanosomiasis on *Theileria parva* in cattle: A randomized controlled trial. *Parasites*  
418 and *Vectors*. 2014;7: 1–10. doi:10.1186/1756-3305-7-432
- 419 24. Torr SJ, Hargrove JW, Vale G a. Towards a rational policy for dealing with tsetse.  
420 *Trends Parasitol*. 2005;21: 537–41. doi:10.1016/j.pt.2005.08.021

421

## 422 **Supporting Information Captions**

423 **S1 Fig. Study site location.**

424 **S2 Fig. Scatter plots showing the relationship between model parameters and output.**

425 **S3 Fig. Partial rank correlation coefficient for each parameter in the tsetse population**  
426 **dynamics model.**

427 **S4 Fig. Results of sensitivity analysis for the trypanosome transmission model.**

428 **S5 Fig. Partial rank correlation coefficients for the trypanosome transmission model.**

429 **S1 Text. Additional methods.**

430 **S2 Text. Model equations.**

431 **S3 Text. Model sensitivity analysis and model fitting.**

432 **S1 Table. Fitted model parameter values**

433

434 **Funding**

435 Zoonosis and Emerging and Livestock Systems (ZELS) programme, Grant/Award Number:  
436 BB/L019035/1; UNICEF/UNDP/ World Bank/WHO Special Programme for Research and  
437 Training in Tropical Diseases (TDR), Grant/Award Number: 221948, ICONZ; Biotechnology  
438 and Biological Sciences Research Council; Department for International Development; The  
439 Economic and Social Science Research Council; The Natural Environment Research Council  
440 and the Defence, Science and Technology Laboratory; Canadian International Development  
441 Research Centre (IDRC); European Union's Seventh Framework Program, Grant/Award  
442 Number: FP7/2007-2013; ICONZ (Integrated Control of Neglected Zoonoses).

443

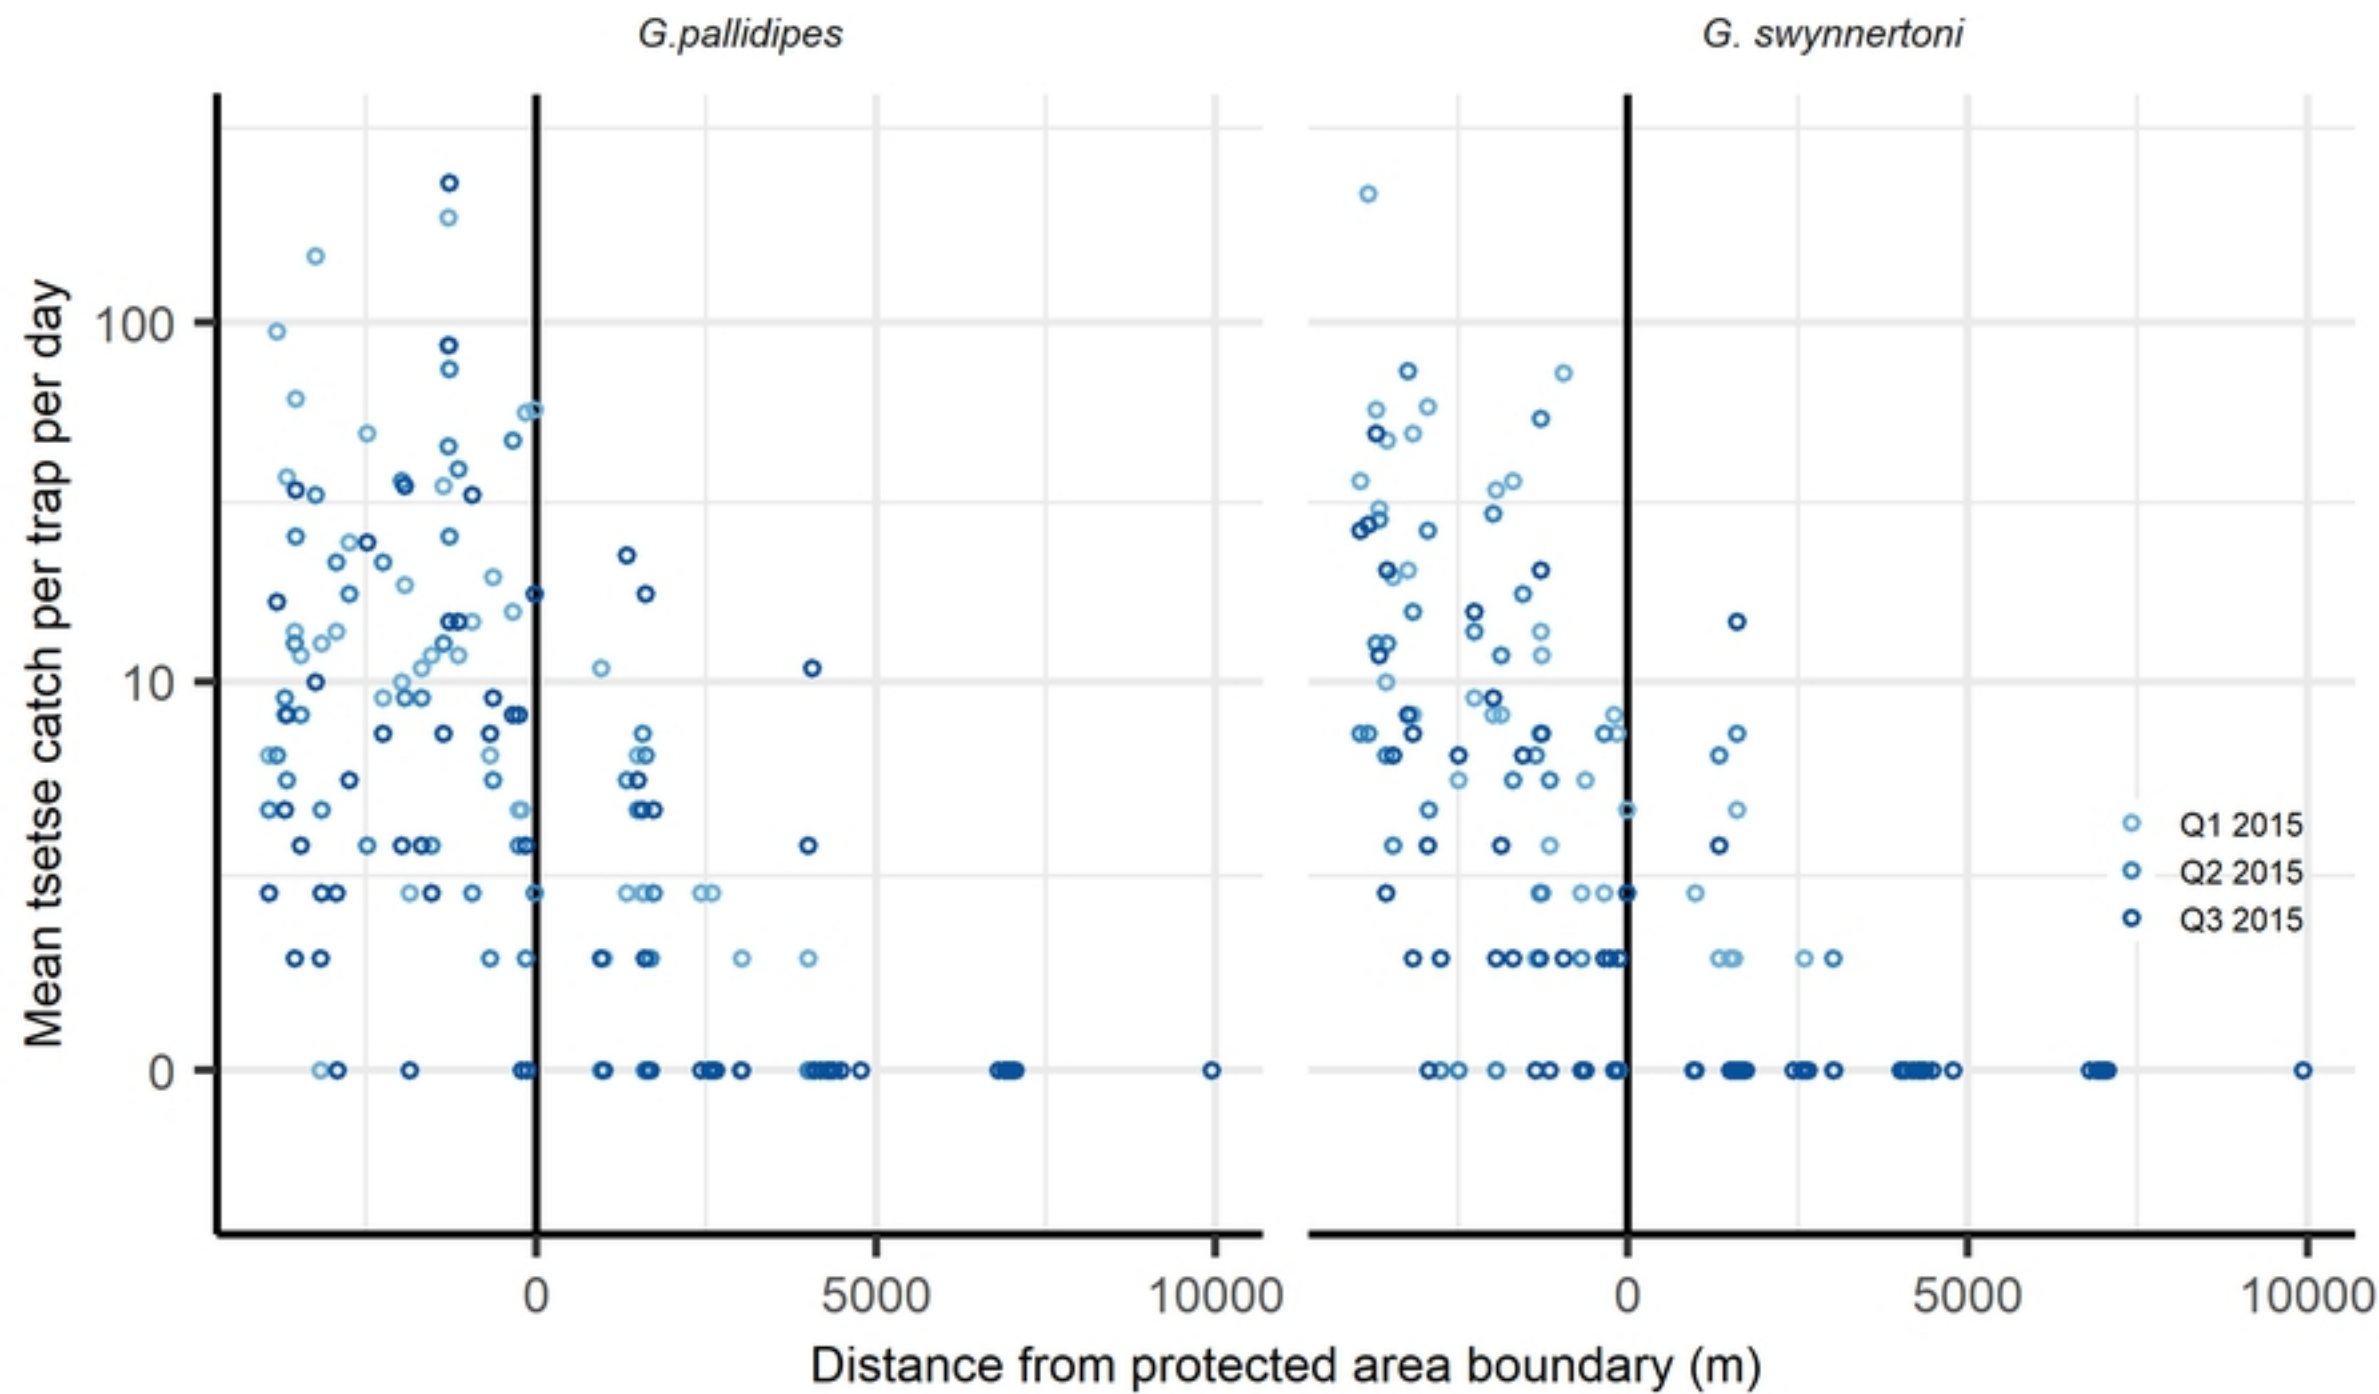

Figure 1

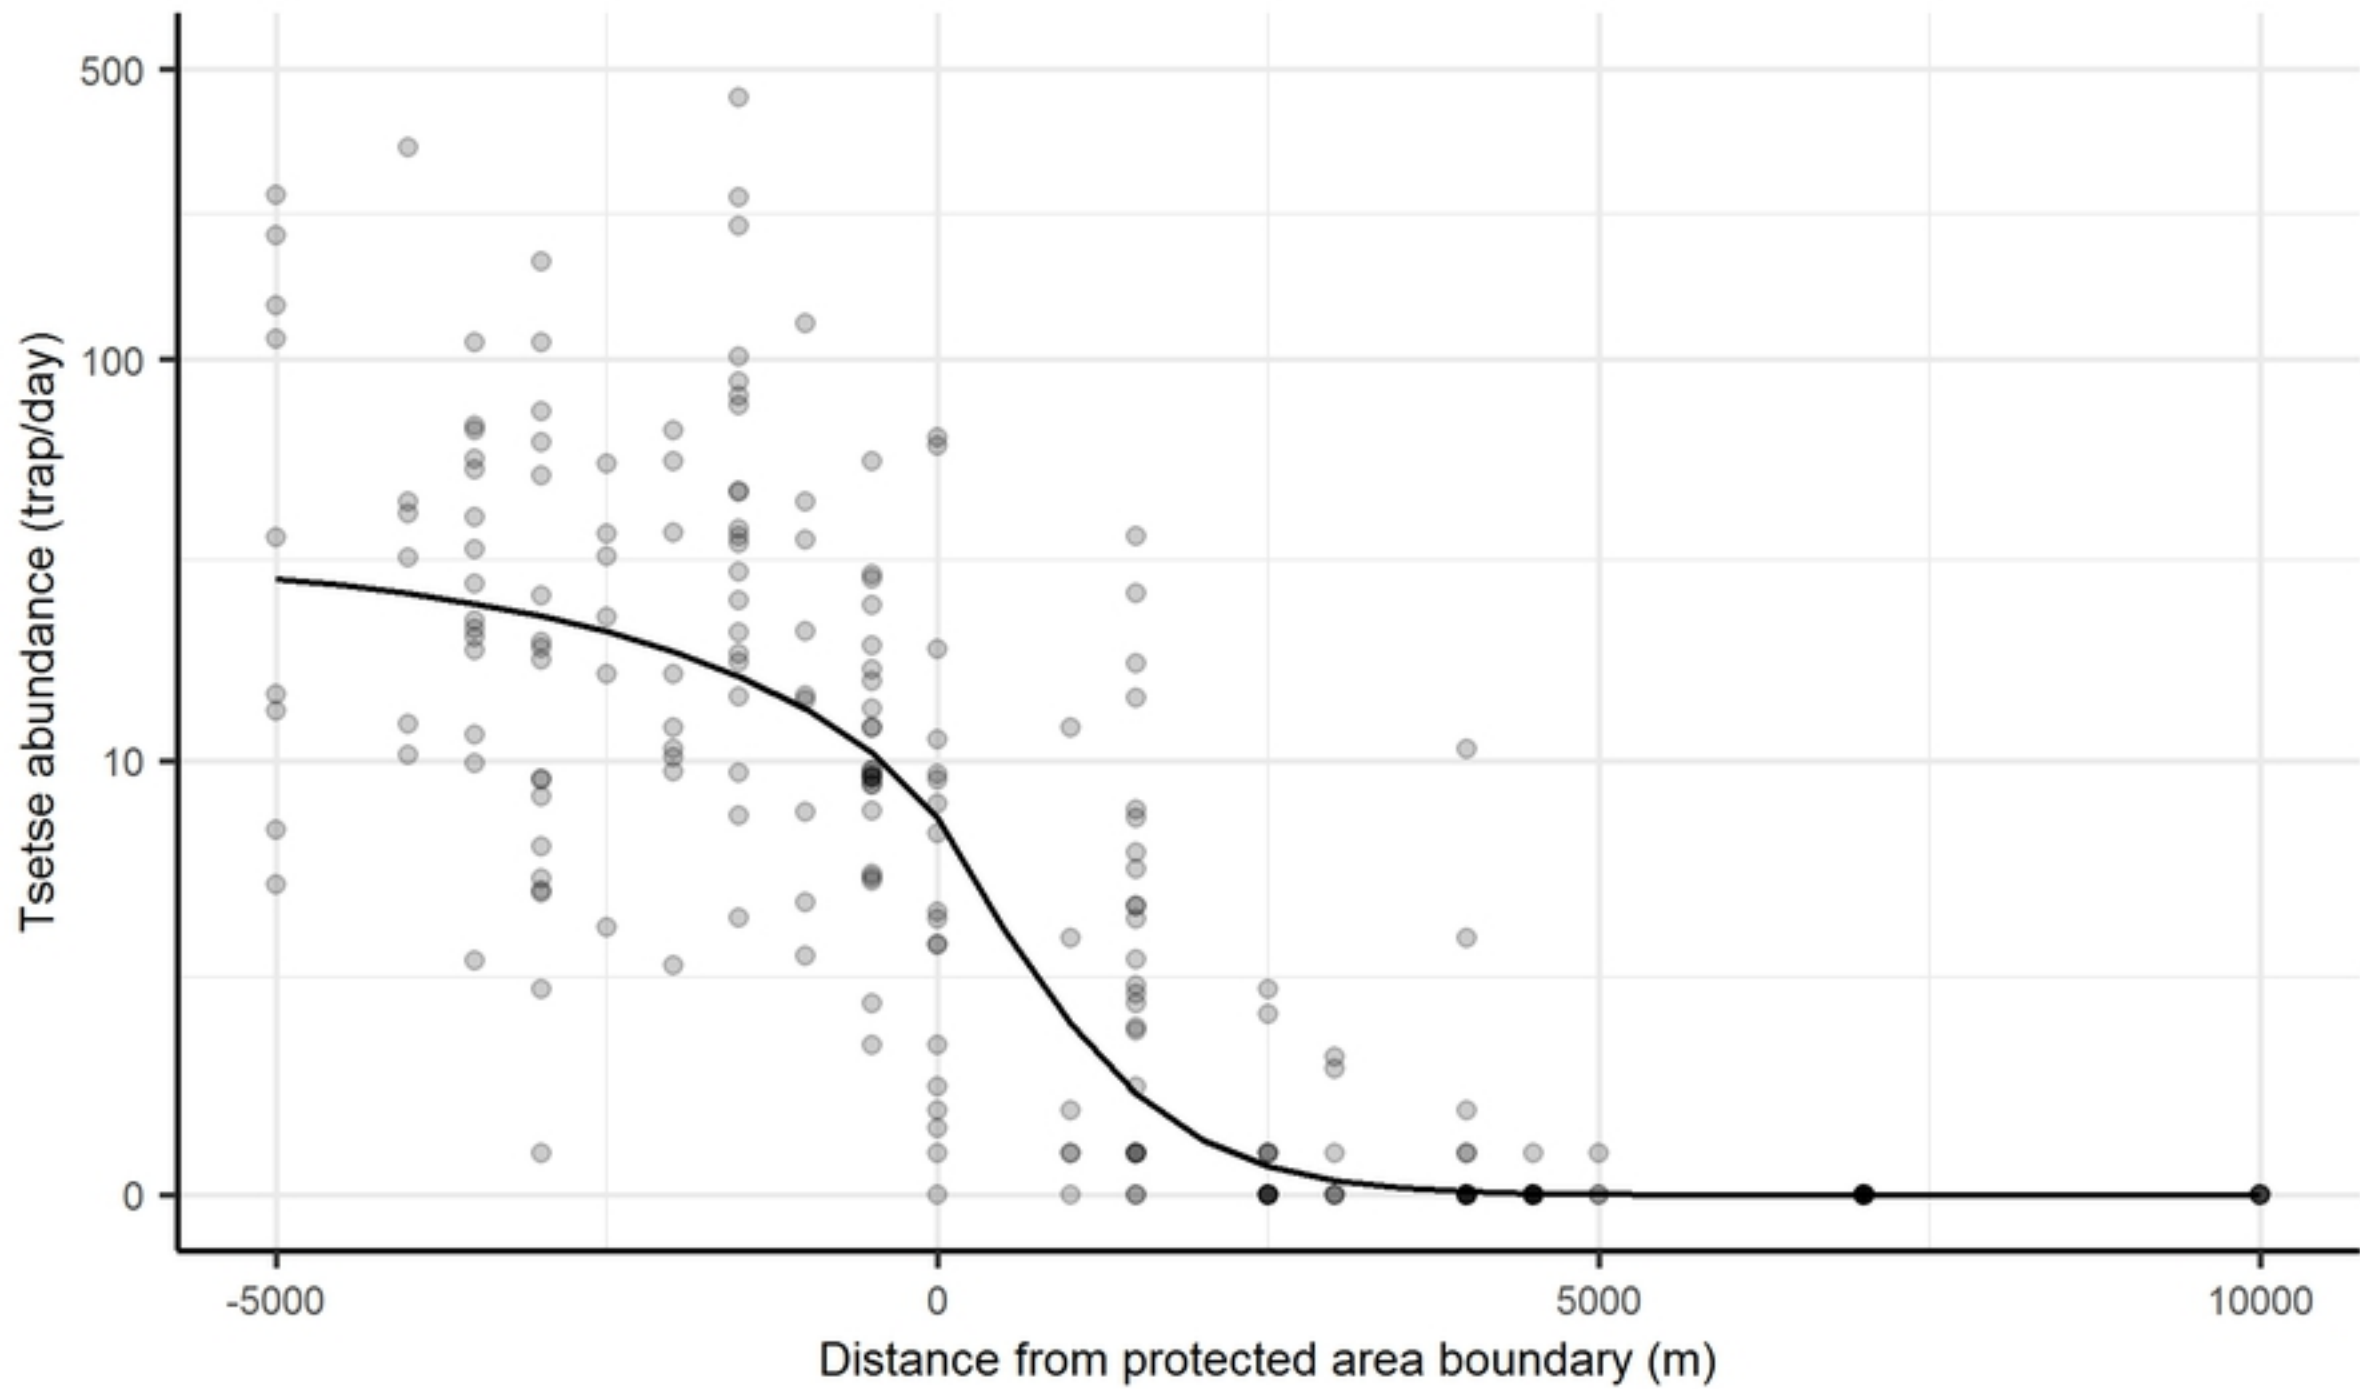

Figure 2

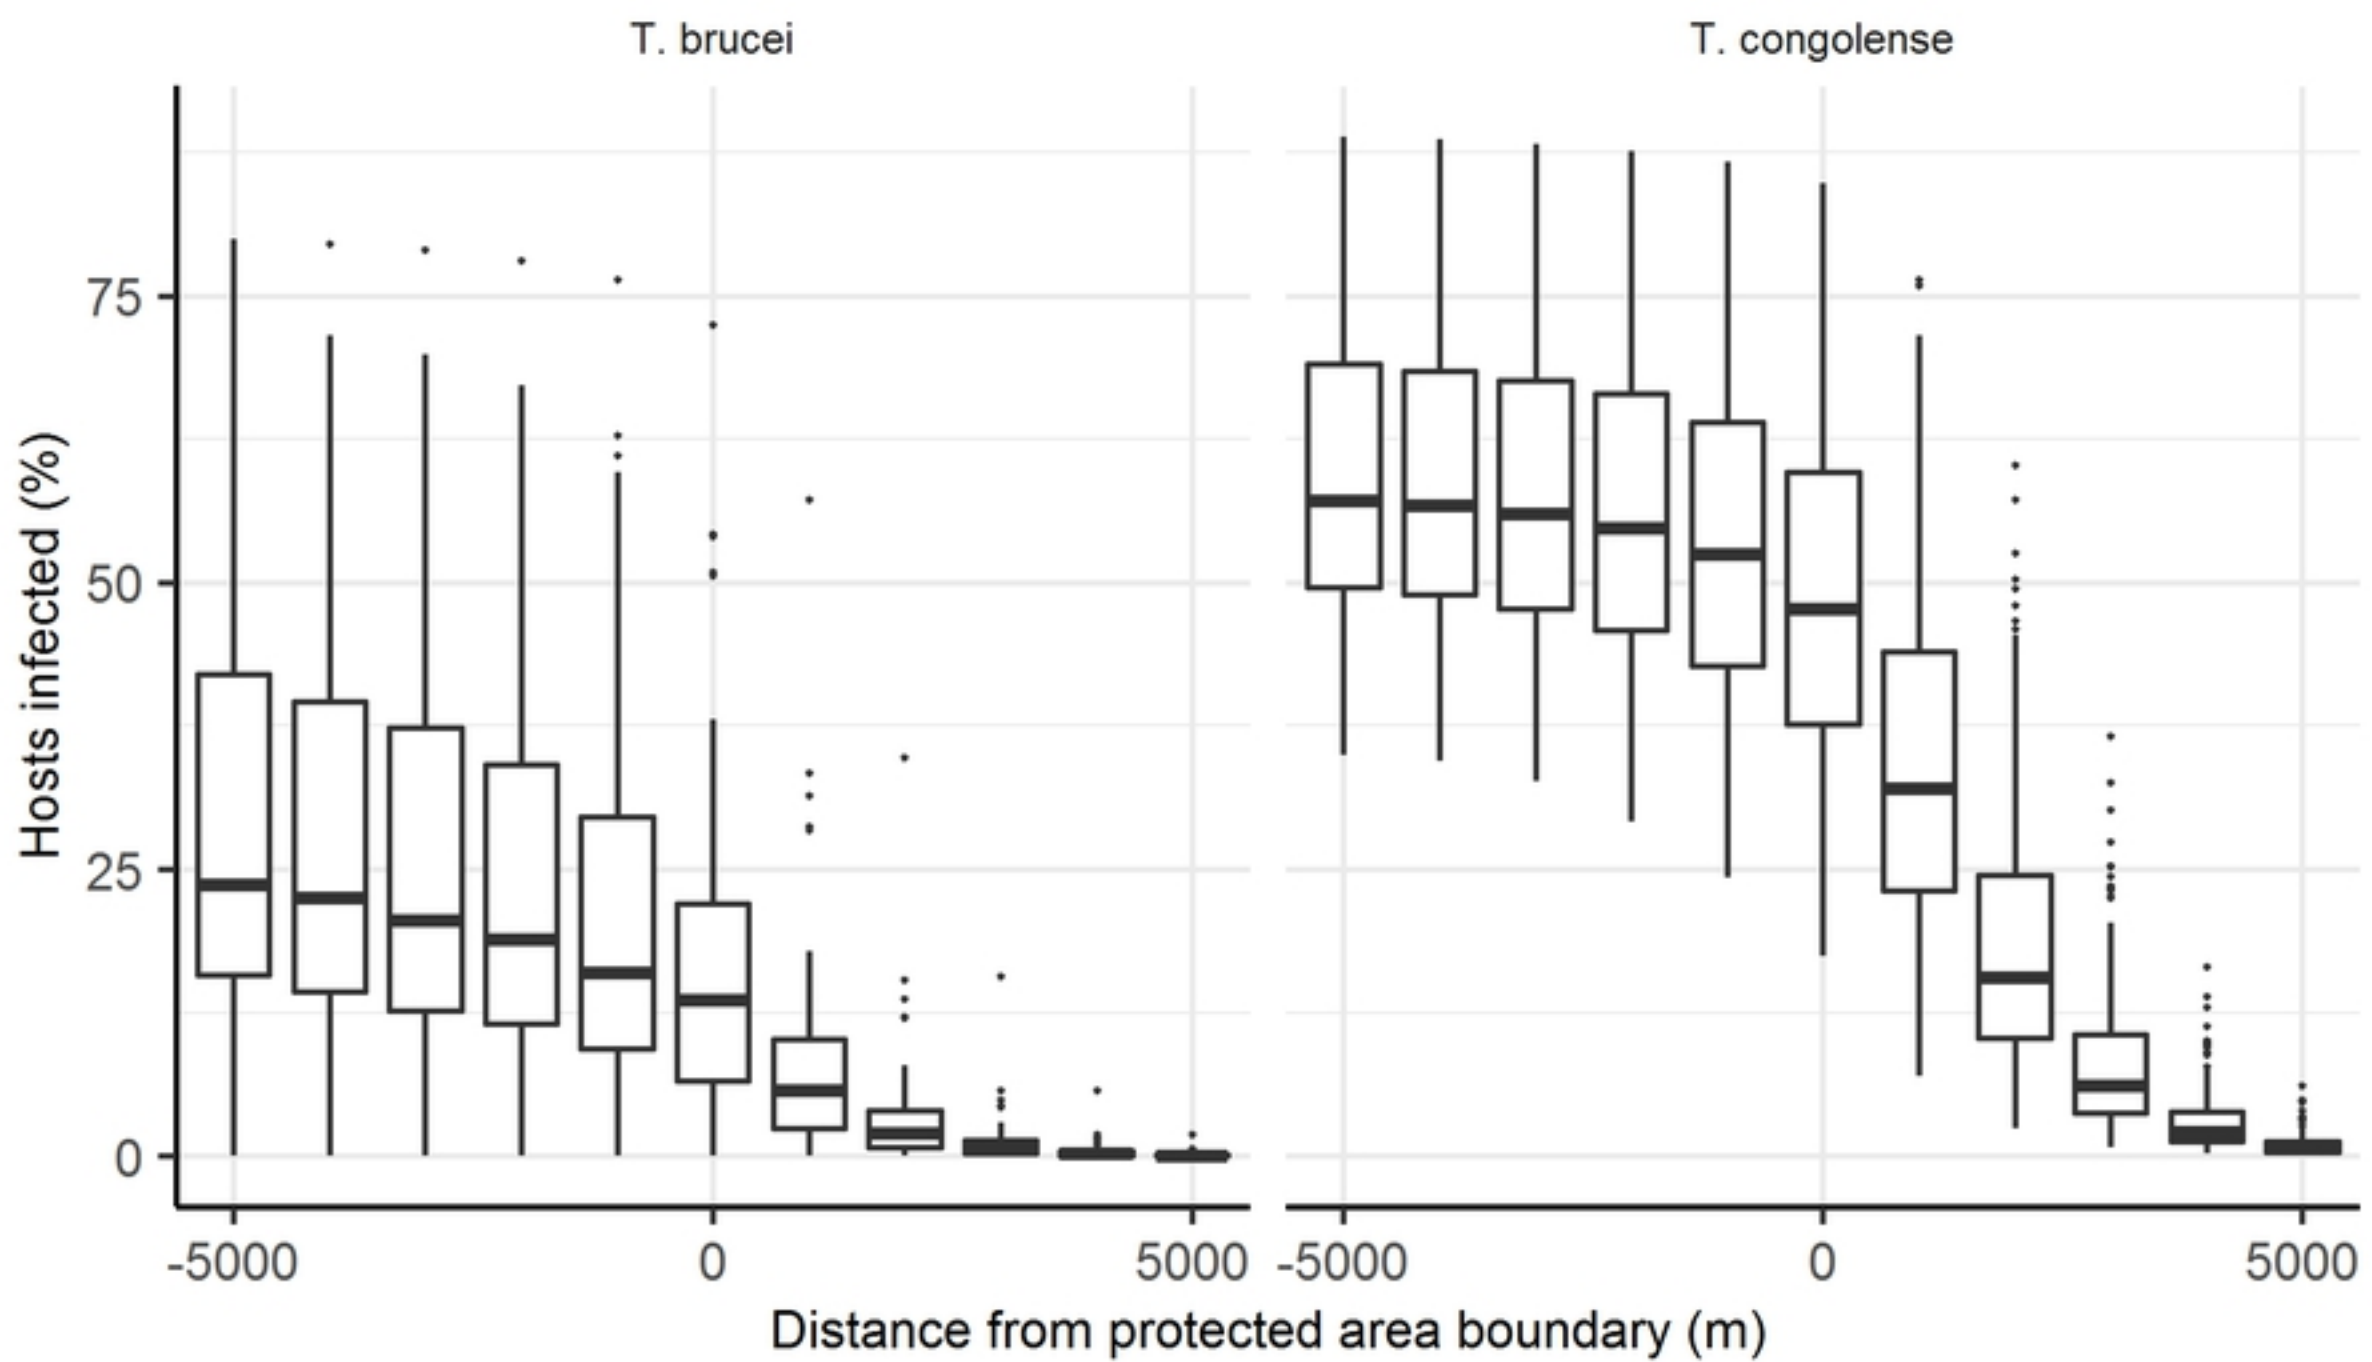

Figure 3
